# Supplementary material
Source: publisher figshare collection journal article supplement (https://tandf.figshare.com/articles/dataset/_/22698367)
Supplement: Supplementary file 1 [file 1]

**Supp Fig 3: FTIR Spectrums of Essential Oils and Polymers**

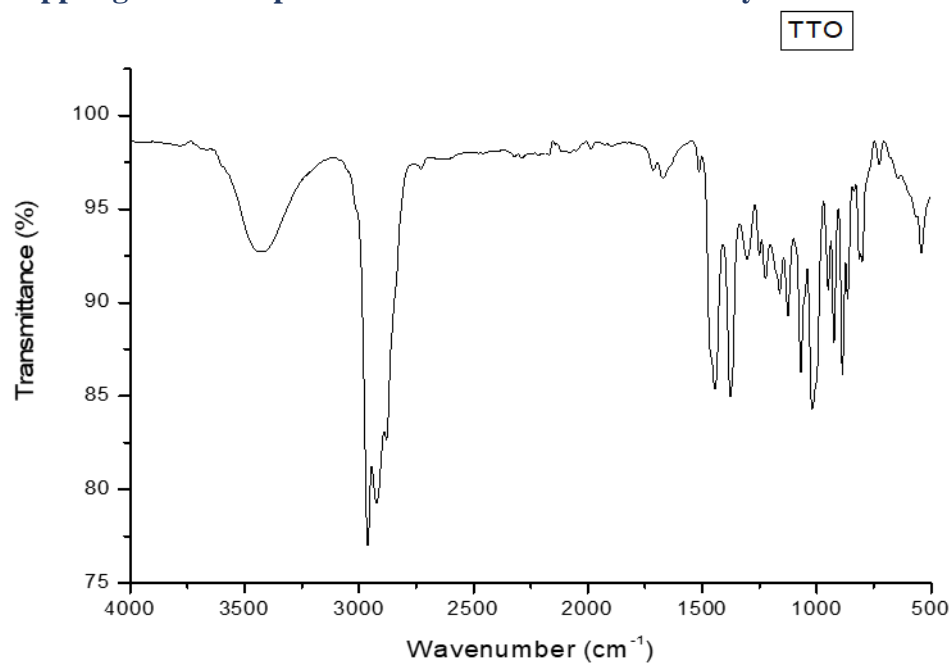

FTIR spectrum of TTO

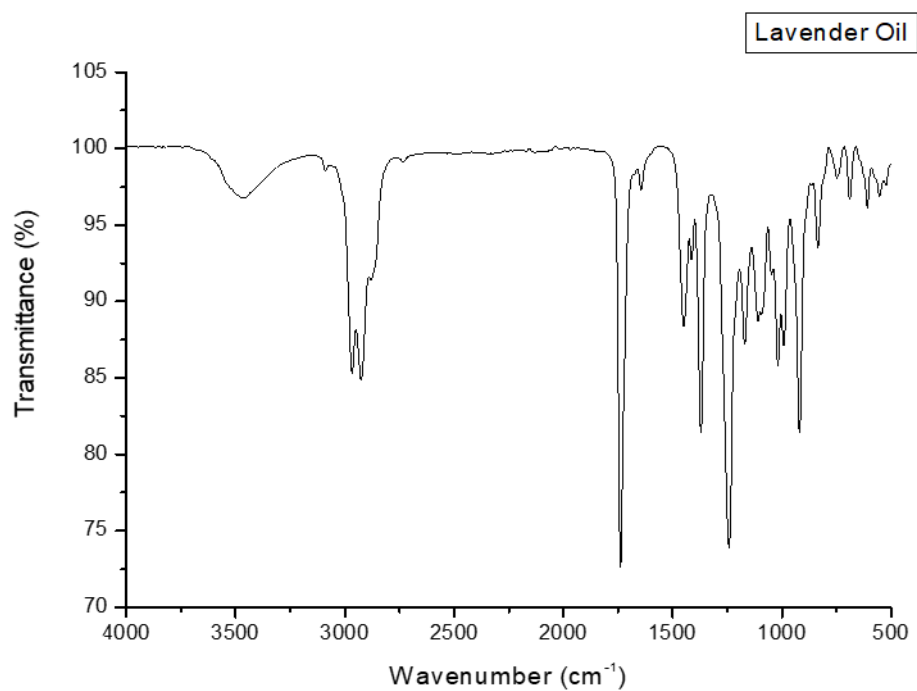

FTIR spectrum of lavender oil

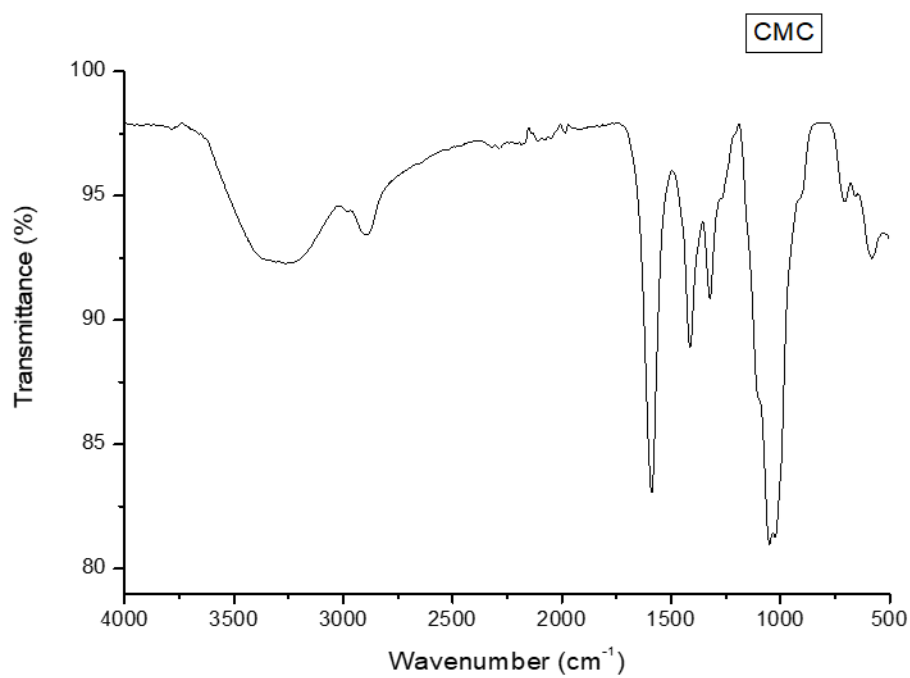

FTIR spectrum of CMC

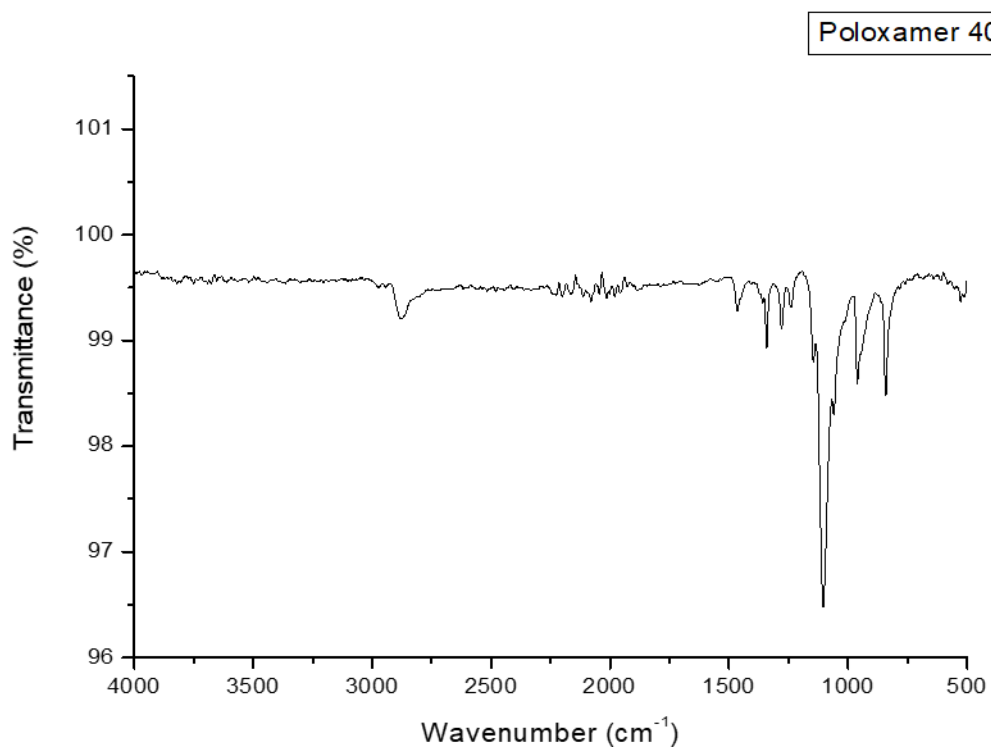

FTIR spectrum of Poloxamer 407
